# Supplementary material
Source: Springer Nature journal article supplement (https://www.springermedizin.de/resource/supplementary/12943_2009_697_MOESM4_ESM.pdf/9554602)

**A.**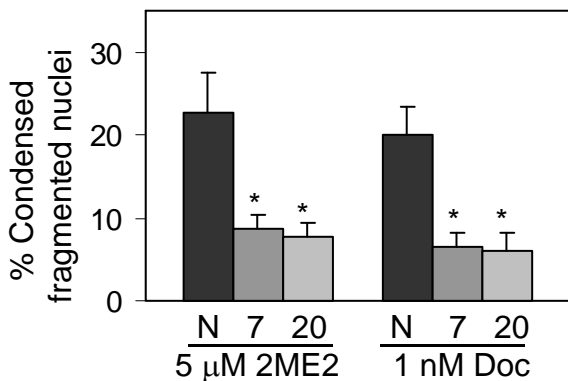**B.**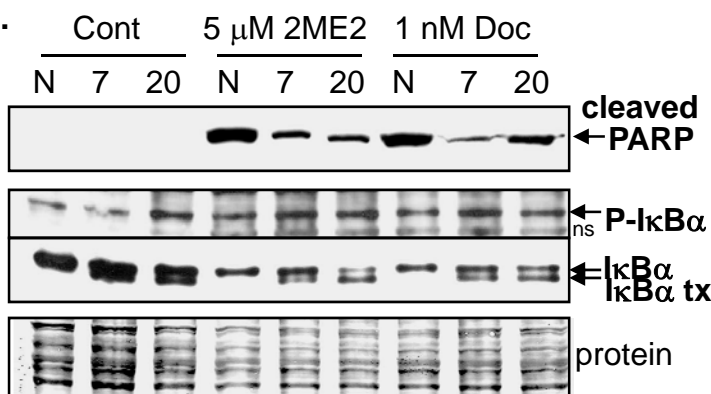**C.**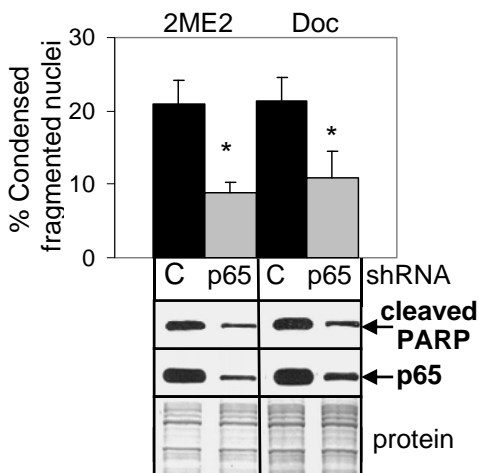

Supplement: MOESM4 [file 9554602]
